# Supplementary material
Source: Springer Nature journal article supplement (https://www.springermedizin.de/resource/supplementary/12888_2013_1455_MOESM2_ESM.pdf/9480276)
Supplement: MOESM2 [file 9480276]

**A**

**Probes for adherence, tolerability, symptoms, and treatment assessment\***

Prescriber-managed

**Patients may offer subjective illness narrative**

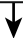

**Patients may express treatment preferences**

Patient-managed on prescriber invitation

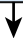

**Treatment planning and LAI scheduling (if chosen)**

(Based on patient status, adherence and tolerance)

Prescriber-managed

**B**

**General open-ended question and patient response**

*"What would you like to talk about?"*

Managed mutually by SW/therapist and patient

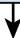

**Life and living skills**

- Probes on negative symptoms and social outcomes
- May check medication adherence
- Discuss finances/money management
- Discuss family life and review practical living skills

SW/therapist-managed

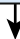

**Goal setting and therapy planning**

*"What would you like to work on?"*

Managed mutually by SW/therapist and patient
